# Supplementary material for: Intestinal Gastrin/CCKBR (Cholecystokinin B Receptor) Ameliorates Salt-Sensitive Hypertension by Inhibiting Intestinal Na+/H+ Exchanger 3 Activity Through a PKC (Protein Kinase C)-Mediated NHERF1 and NHERF2 Pathway
Source: PubMed Central journal article supplement (PMC9278716; doi:10.1161/hypertensionaha.121.18791), 2022-06-08
Supplement: hyp-79-1668-s002.pdf [file hyp-79-1668-s002.pdf]

**\* Short In Vivo Checklist**

AHA - Preclinical Animal Testing : Prevention of bias is important for experimental cardiovascular research. **This short checklist must be completed, and the answers should be clearly presented in the manuscript as well.** The checklist will be used by reviewers and editors but will not be published. If a revision is requested, you will be required to complete at revision submission a more detailed checklist that will be published with the accepted article.

This study involves animals:

Yes

**Animals**

Species, age, sex, strains, and sources of animals are described:

Yes

**Randomization**

Randomization and allocation concealment were performed:

Yes

**Blinding**

Blinding was performed:

Yes

**Inclusions and Exclusions (a)**

Specific criteria for inclusions and exclusions are specified:

Yes

**Inclusions and Exclusions (b)**

Criteria for inclusions and exclusions were set before the study:

Yes

**Reporting of Excluded Animals**

All animals excluded after the randomization are reported:

Yes

**Statistical Methods**

Statistical Methods are described:

Yes

---

Date completed: 04/20/2022 08:16:12

User pid: 636022
